# Supplementary material
Source: PubMed Central journal article supplement (PMC5576182)

## Extended Data Figure 1c

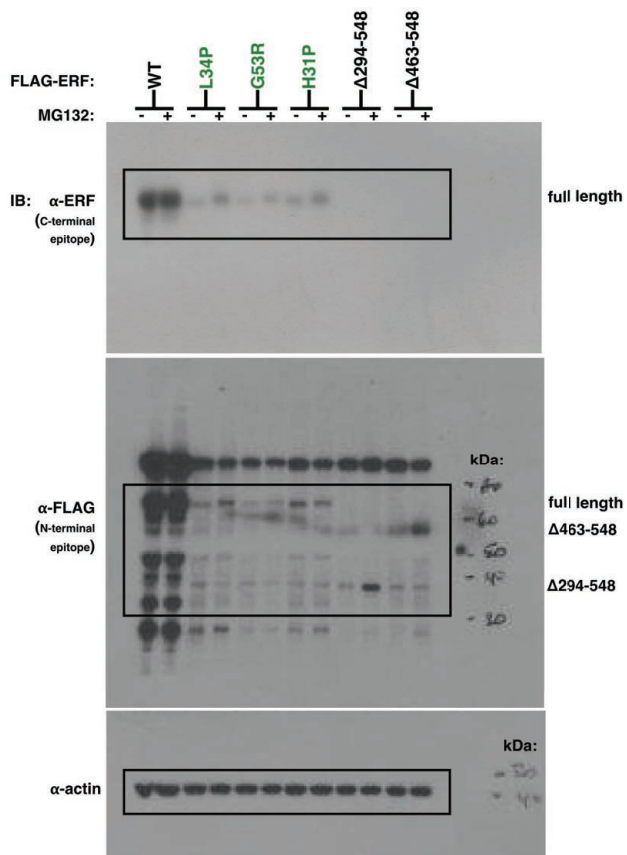

## Extended Data Figure 1e

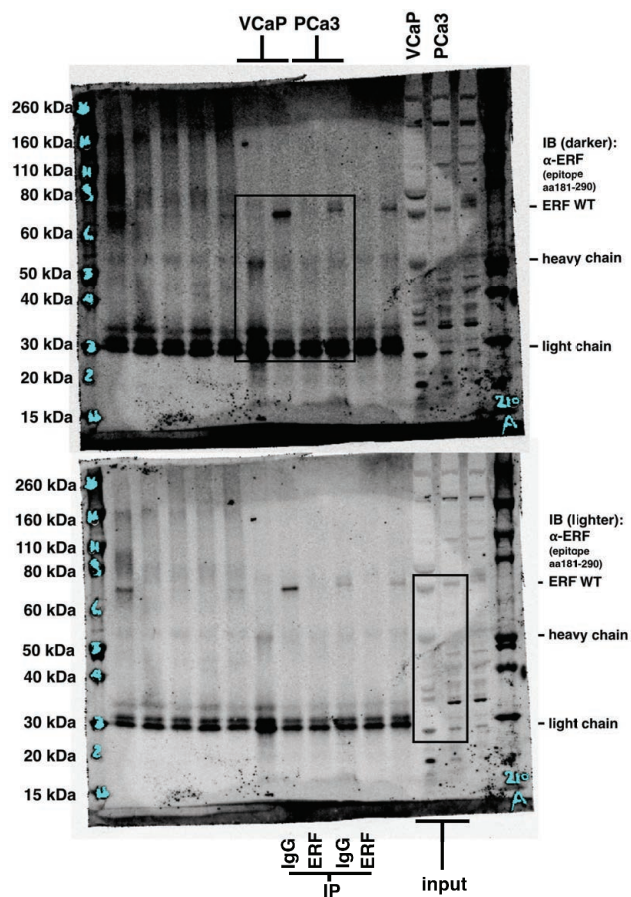

## Extended Data Figure 1f

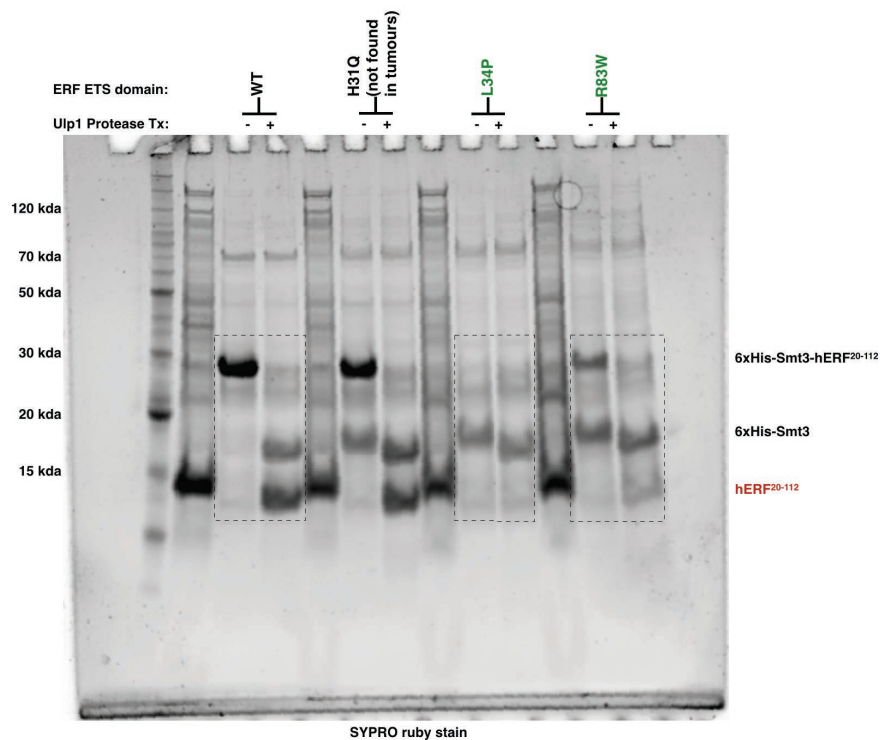

# Extended Data Figures 2a and 10d

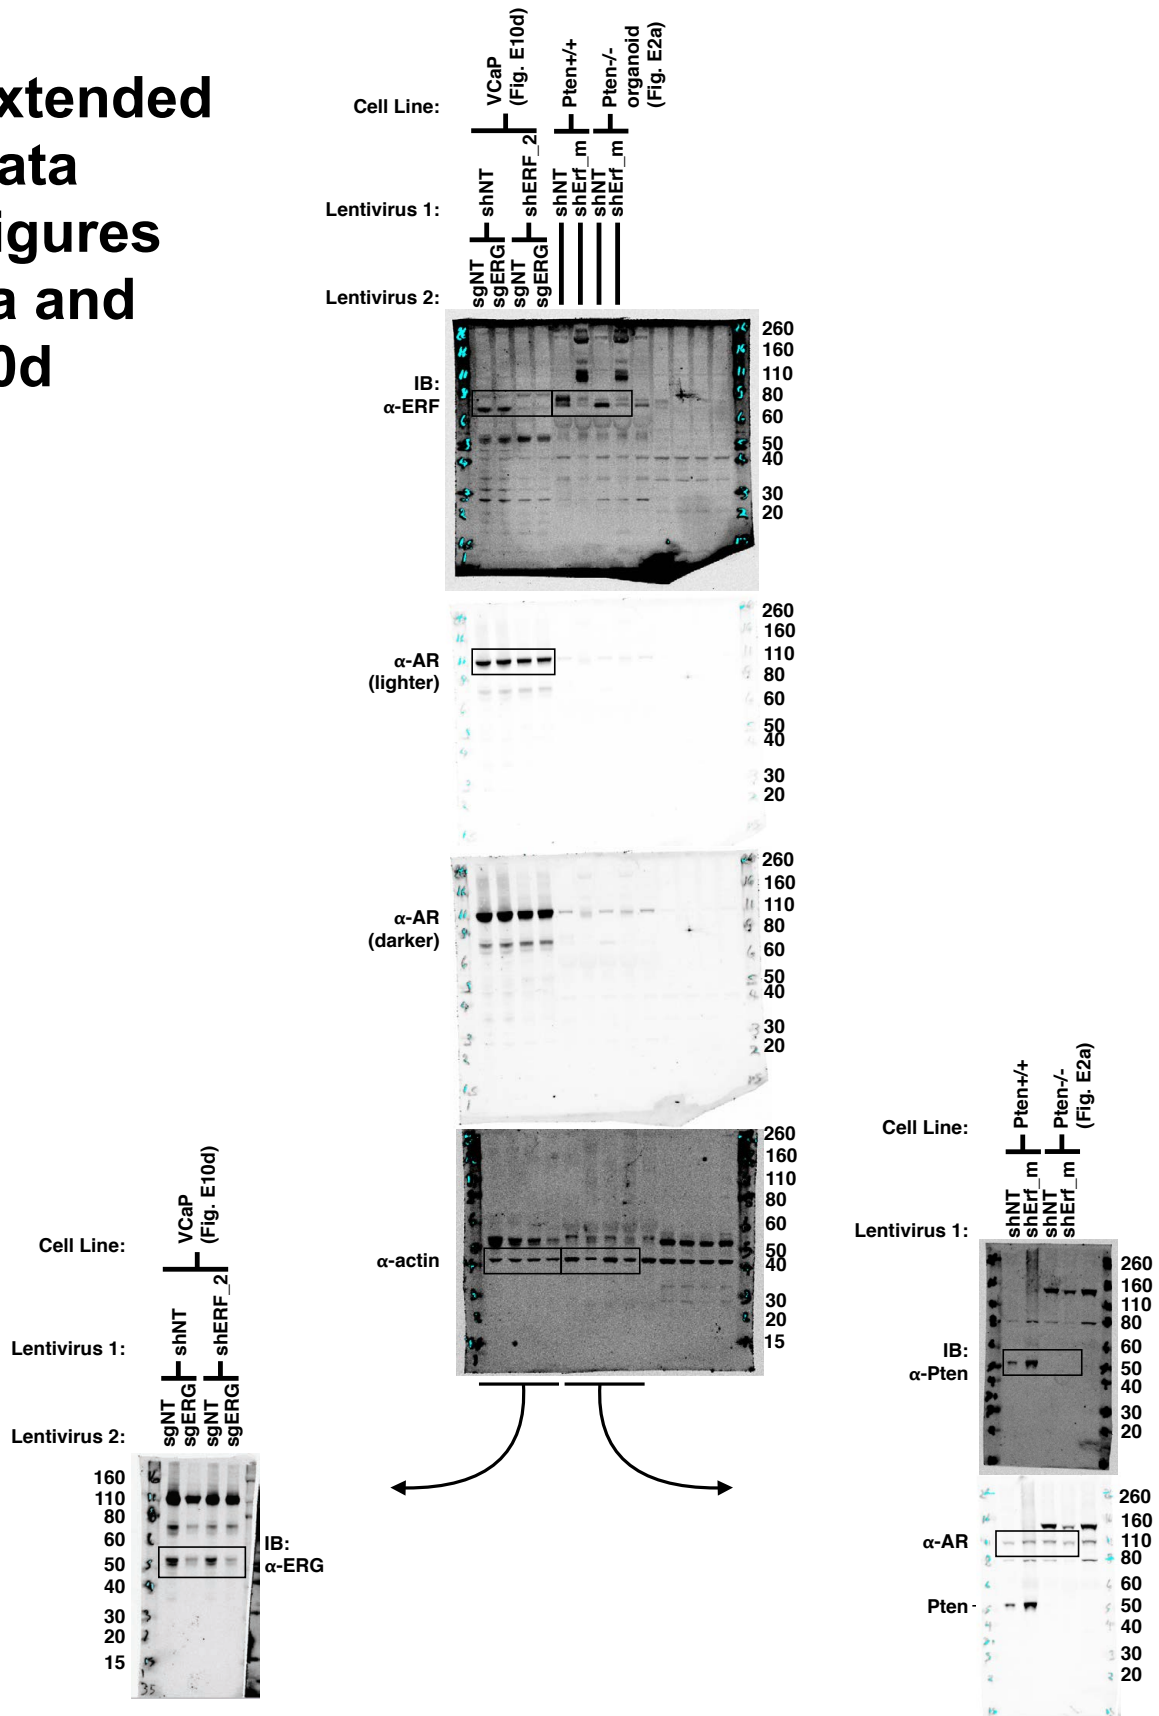

# Extended Data Figures 4a and 6b

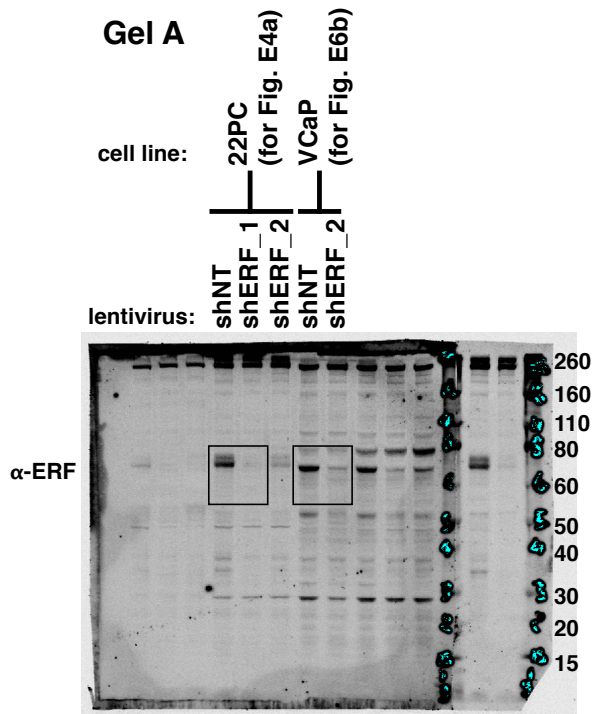

IB:  $\alpha$ -ERG

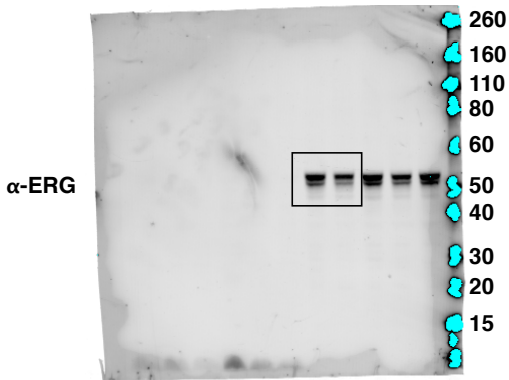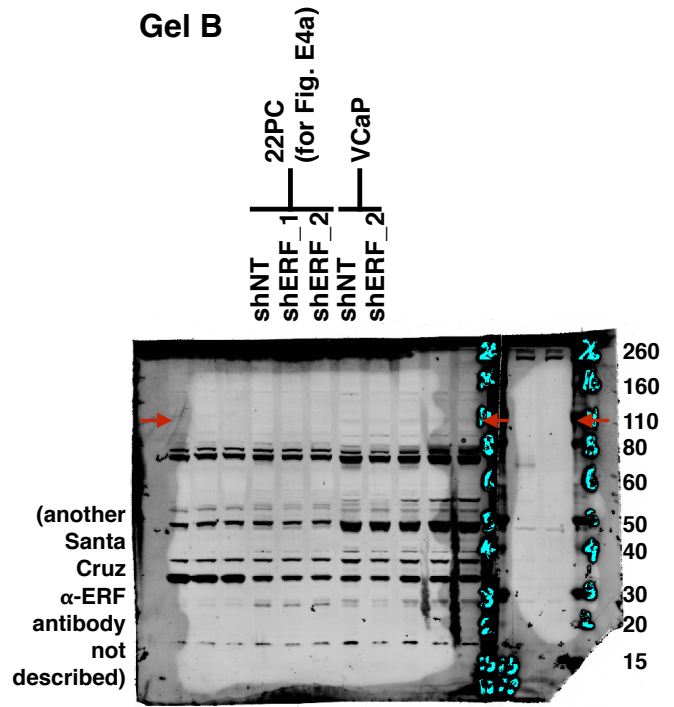

IB:  $\alpha$ -AR

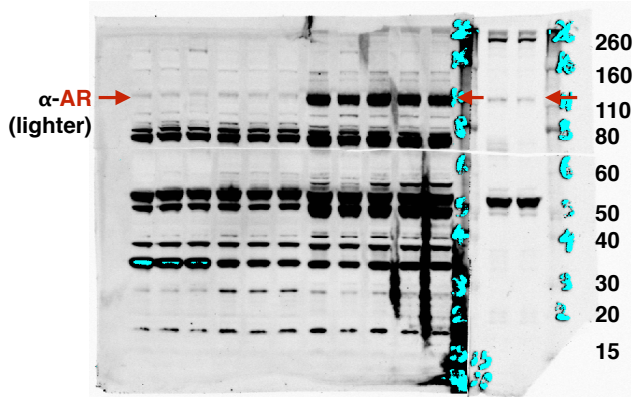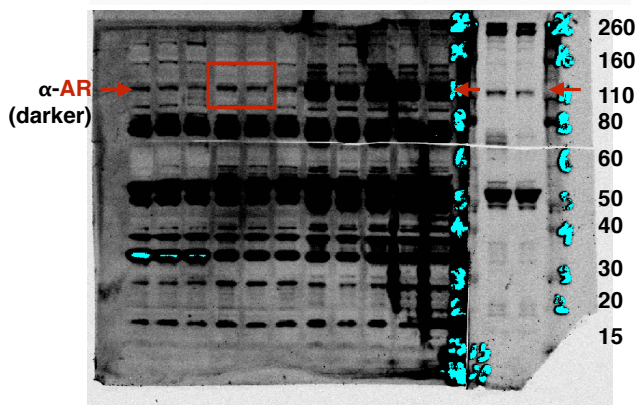

# Extended data figure 6a

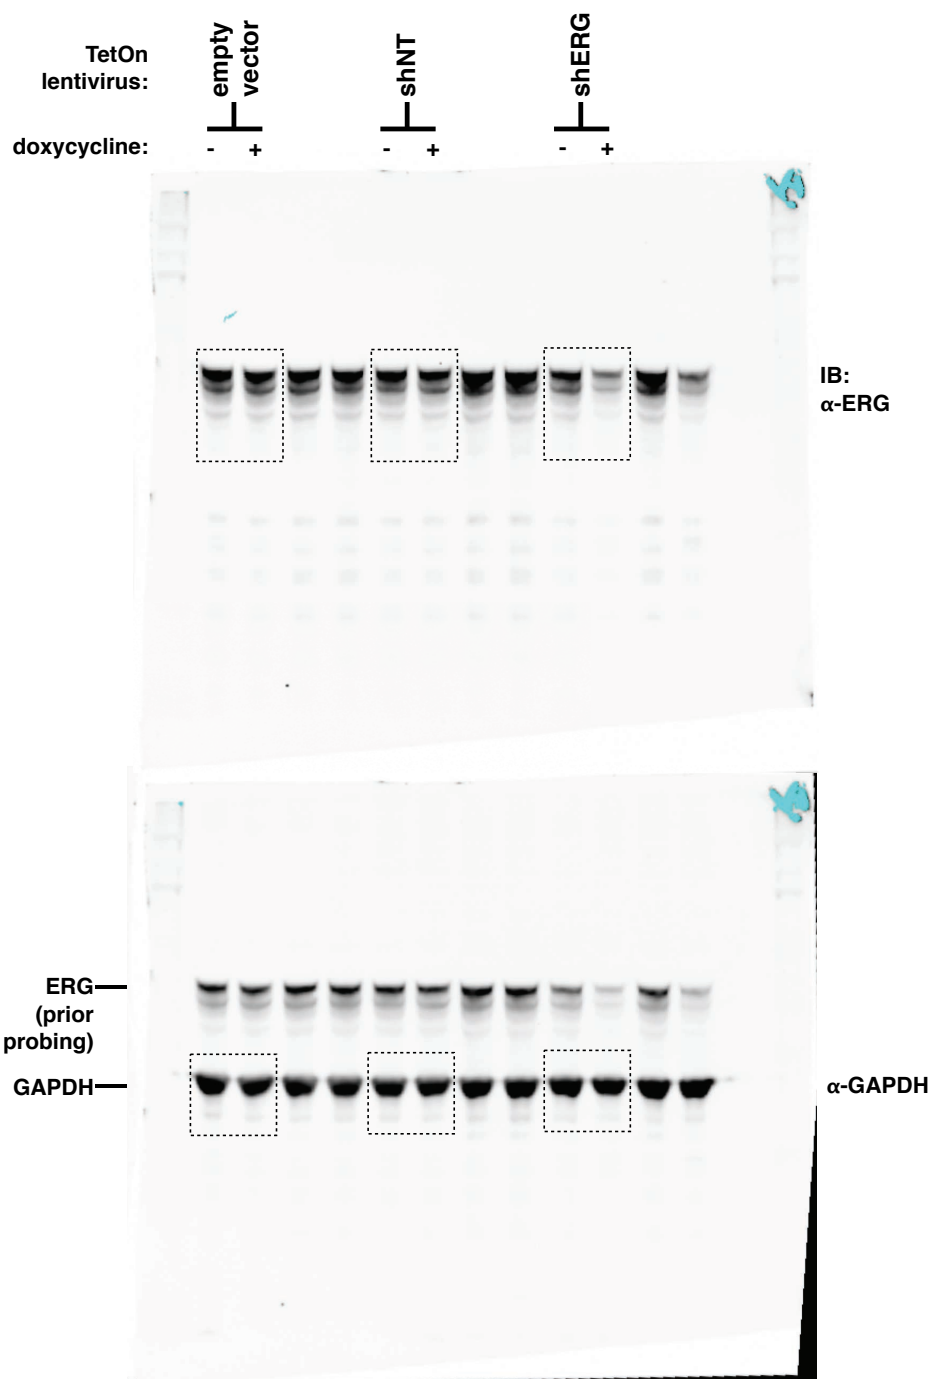

Extended Data Figure 6c

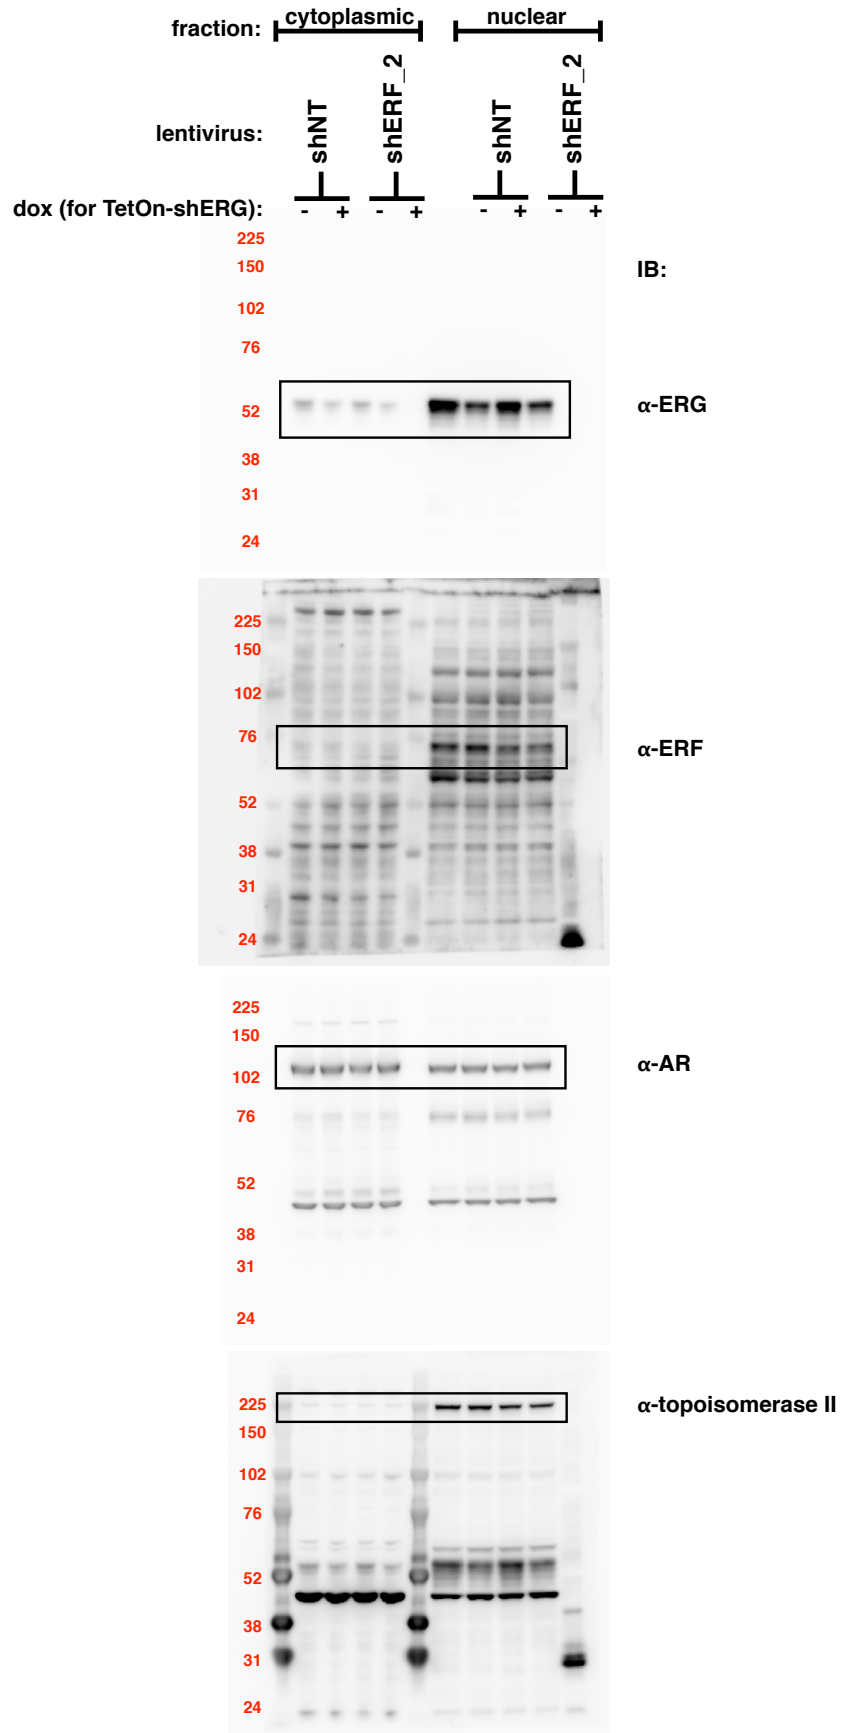

# Extended Data Figure 9a

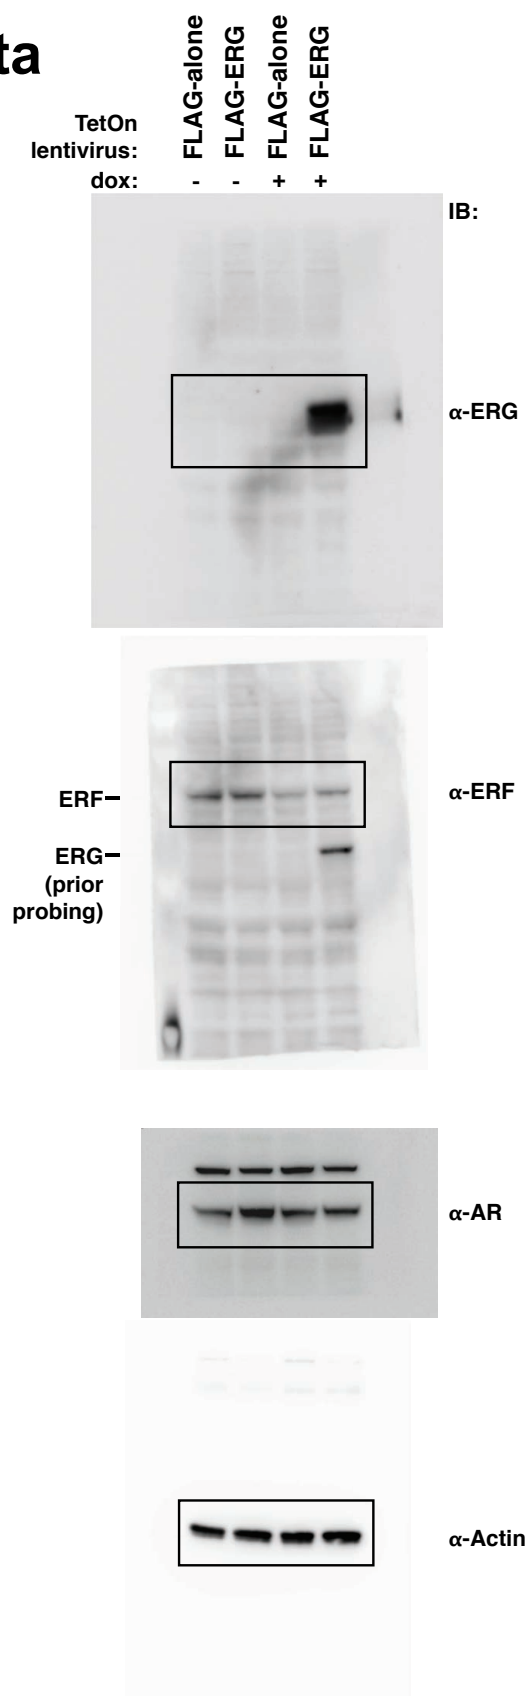

# Ext Data Fig 10a

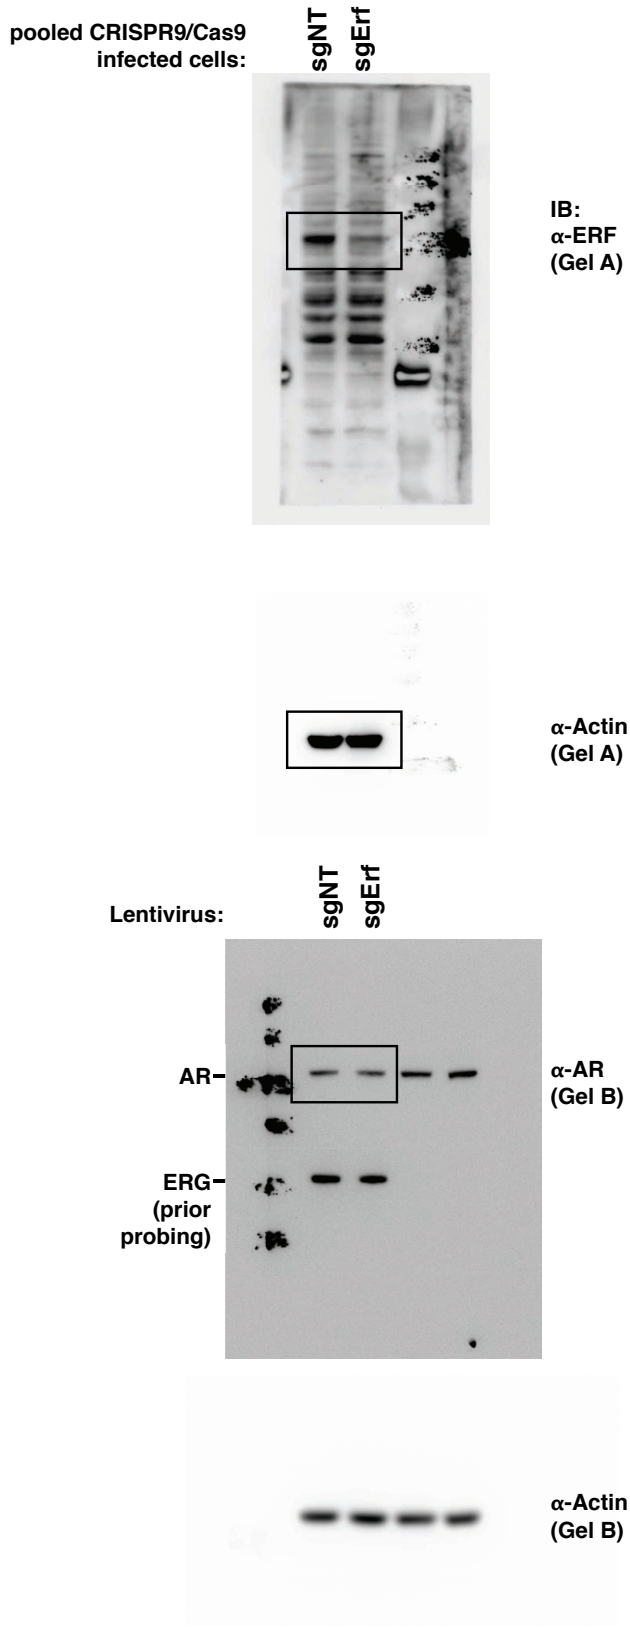

# Extended Data Fig 10b

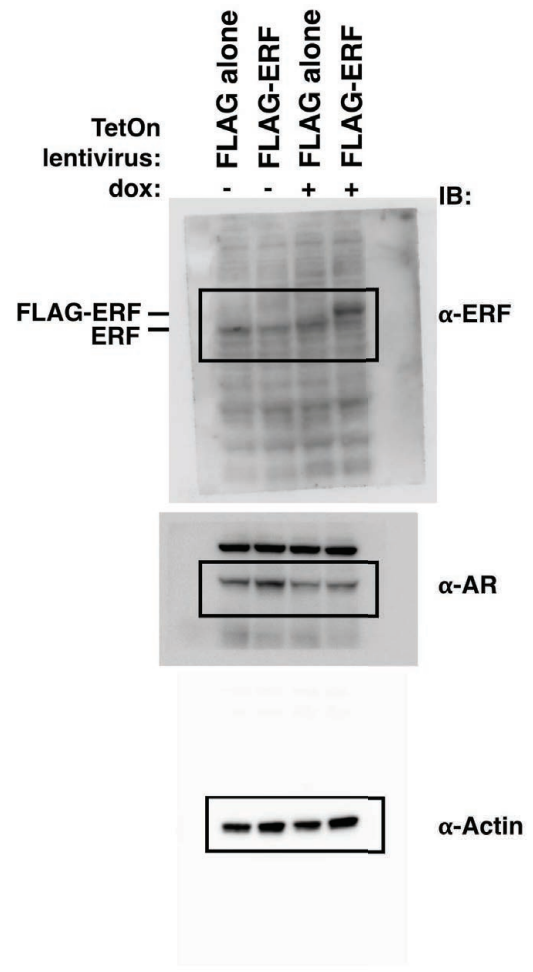

Supplement: NIHMS895975-supplement-Supplementary_materials.pdf [file NIHMS895975-supplement-Supplementary_materials.pdf]
